# Supplementary material
Source: publisher figshare collection journal article supplement (https://gsajournals.figshare.com/ndownloader/files/26786000)
Supplement: Supplementary file 1 [file 26786000]

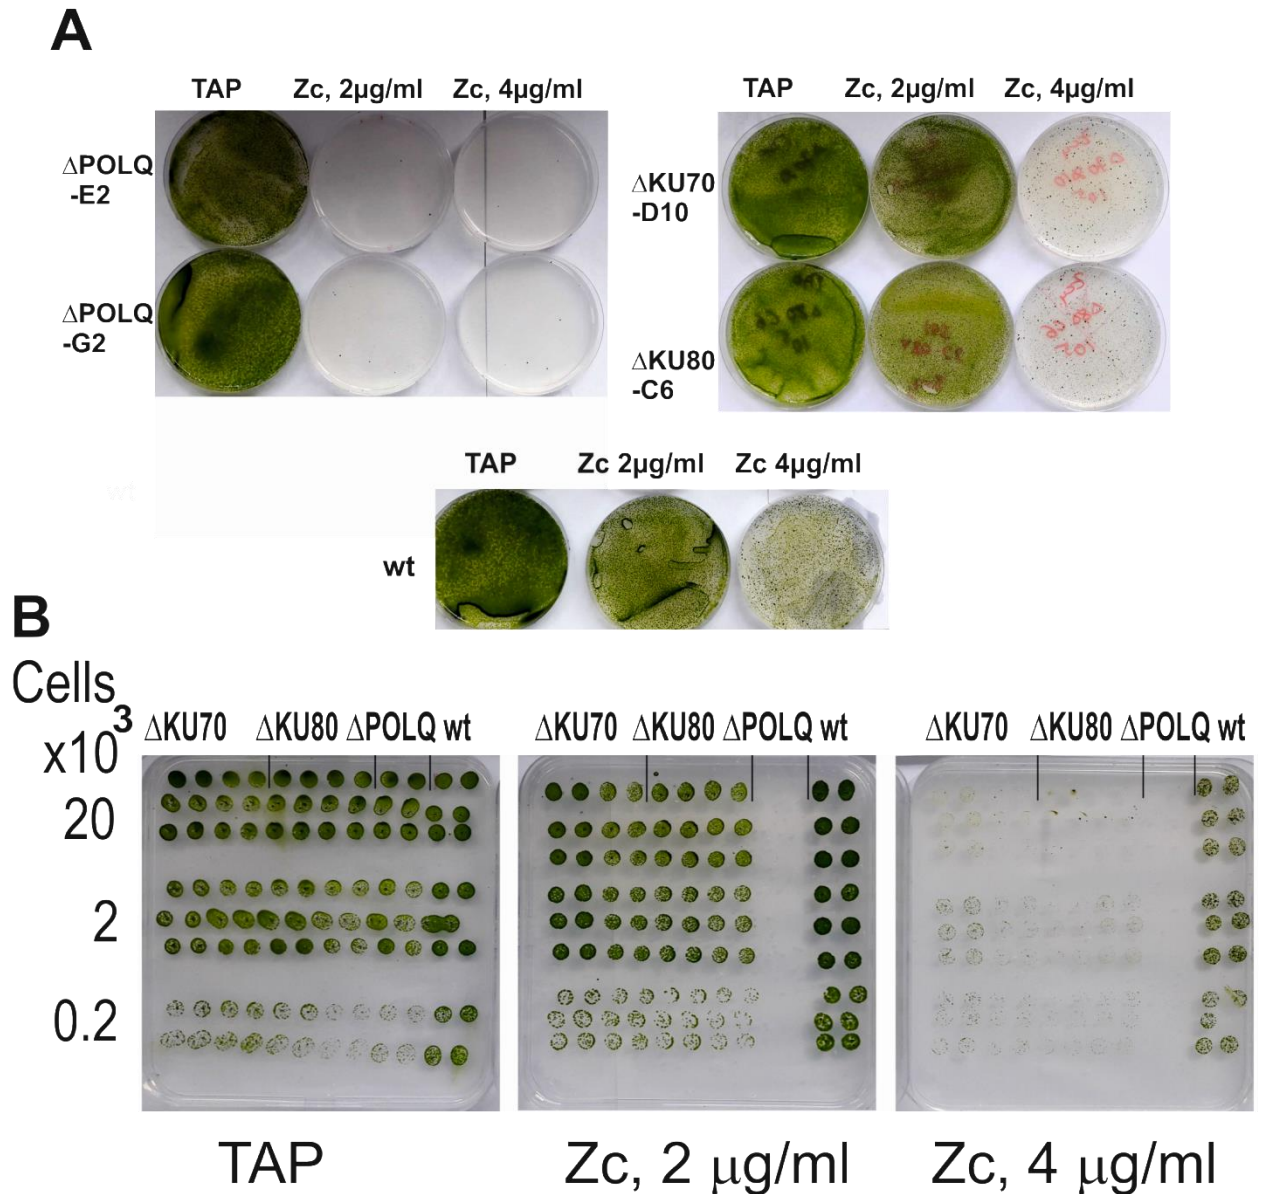

**Figure S2** Sensitivity of *Chlamydomonas reinhardtii* mutants to zeocin treatment. (A)  $10^5$  cells of the indicated mutants and parental wt strain CC-125 were plated on solid TAP medium without zeocin (TAP) or containing zeocin at a concentration of 2  $\mu$ g/ml or 4  $\mu$ g/ml. (B) The "spot" test was carried out under similar conditions. Two spots (in a line) in triplicate (in a column) were made by plating of 5  $\mu$ l of suspensions containing the indicated number of cells for each strain:  $\Delta$ KU70-C8 and  $\Delta$ KU70-D10 (indicated by  $\Delta$ KU70), ( $\Delta$ KU80-C4 and  $\Delta$ KU80-C6 (indicated by  $\Delta$ KU80),  $\Delta$ POLQ-E2 (indicated  $\Delta$ POLQ), wt (CC125). Colonies were counted or photographed after growing for 10 days. Experiments were repeated 3 times.
